# Supplementary material for: The global bacterial regulator H-NS promotes transpososome formation and transposition in the Tn5 system
Source: PubMed Central journal article supplement — Nucleic Acids Res. 2008 Nov 28;37(2):309–21. doi: 10.1093/nar/gkn935 (PMC2632911; doi:10.1093/nar/gkn935), 2008-11-28
Supplement: gkn935_1.pdf [file gkn935_1.pdf]

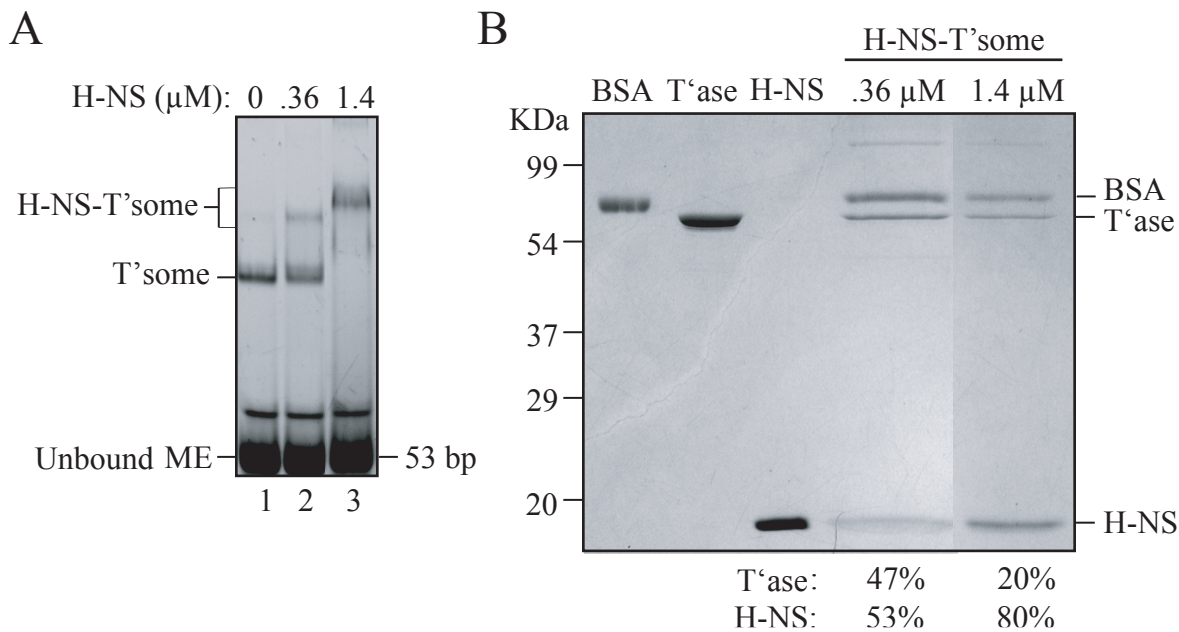

Figure S1. Stoichiometric analysis of H-NS transpososomes. **(A)** H-NS transpososomes were formed as in Figure 2B, except that the ME DNA was not labeled with  $^{32}\text{P}$ . **(B)** Gel slices from a mobility-shift gel equivalent to that shown in **(A)** containing H-NS transpososomes were obtained and proteins were eluted. Eluates were analyzed by SDS-PAGE and proteins detected by Coomassie Blue staining. Note that BSA is present in the transpososome assembly reaction and some BSA co-purifies with the H-NS transpososomes. Samples in the first three lanes include purified BSA, Tn5 transposase and H-NS, respectively. The protein composition of the H-NS transpososomes, calculated from the band intensities of H-NS and transposase species in the 'H-NS-T'some' lanes of the gel image in **(B)**, are indicated as percentages of total protein within the respective H-NS transpososomes.
