# Supplementary material for: The global bacterial regulator H-NS promotes transpososome formation and transposition in the Tn5 system
Source: PubMed Central journal article supplement — Nucleic Acids Res. 2008 Nov 28;37(2):309–21. doi: 10.1093/nar/gkn935 (PMC2632911; doi:10.1093/nar/gkn935), 2008-11-28
Supplement: gkn935_2.pdf [file gkn935_2.pdf]

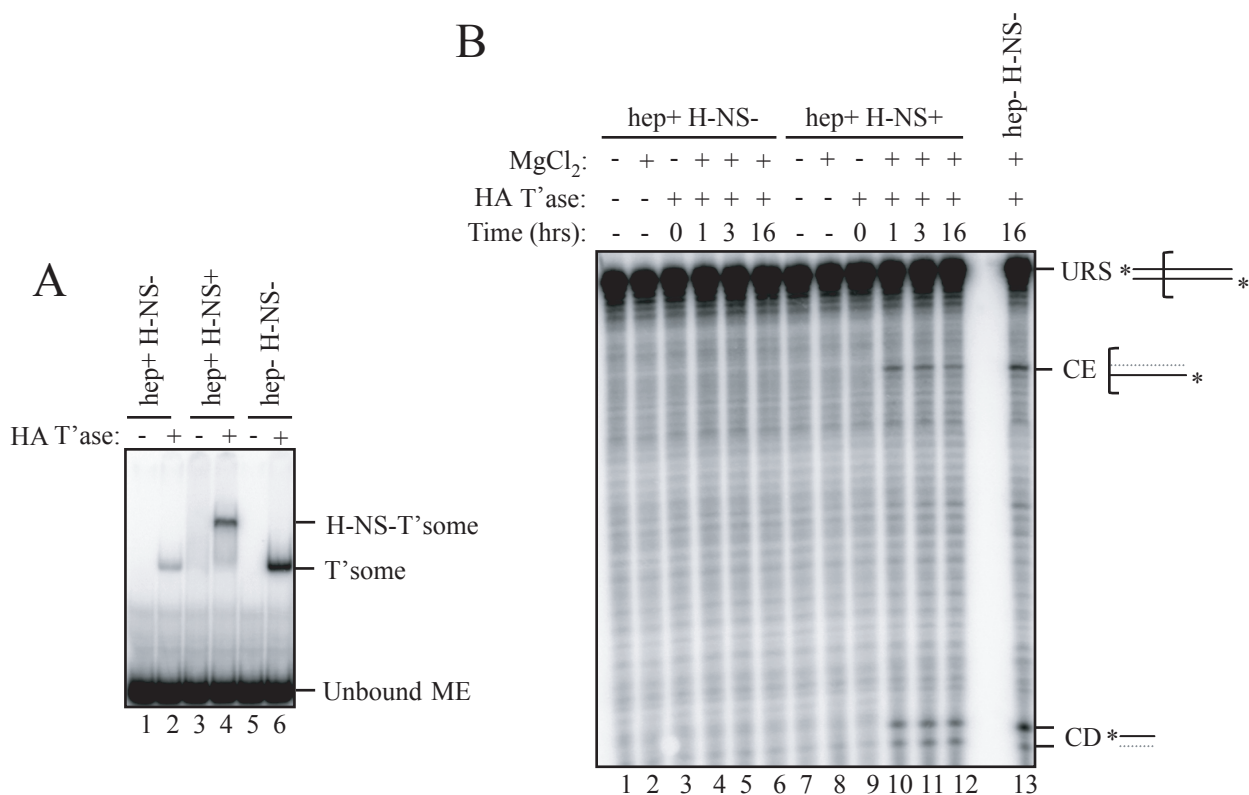

Figure S2. Donor cleavage assay for the H-NS transpososome formed in the presence of heparin. **(A)** Transpososome assembly reactions were carried out with and without H-NS in the presence of heparin as in Figure 4A. An additional reaction was also carried out in the absence of heparin and H-NS. A mobility-shift assay is shown. **(B)** An aliquot of each of the reactions shown in lanes 2, 4 and 6 of part A was mixed with MgCl<sub>2</sub> (final concentration 10 mM) for the indicated times to initiate donor cleavage. Reactions were terminated and the DNA was on a high resolution denaturing gel. The radioactive counts loaded per lane were approximately equivalent for the full set of samples. (URS) unreacted substrate; (CE) cleaved end; (CD) cleaved donor DNA (illustrations beside the gel image show each of these species in black lines). The transposon end hairpin species was resolved at the first time point and is therefore not shown on the gel.
